# Supplementary material
Source: PubMed Central journal article supplement (PMC4845637)
Supplement: Supp_Fig1.pdf [file Supp_Fig1.pdf]

## Supplementary Data

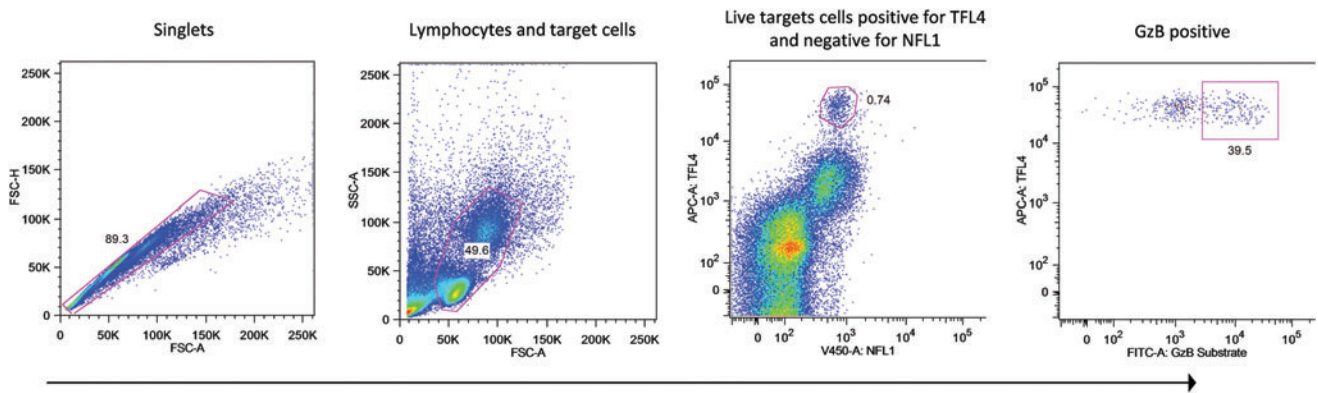

**SUPPLEMENTARY FIG. S1.** Gating strategy for flow cytometric analysis. In this representative sample, cells were first gated for singlets (FSC-H vs. FSC-A) and lymphocytes and target cells (SSC-A vs. FSC-A). The lymphocytes and target gate are further analyzed positive for TFL4 and negative for NFL1, taking only the live target cells. Frequency of granzyme B (GzB) expression is then determined from this gated population.
