# Supplementary material
Source: PubMed Central journal article supplement (PMC4845637)
Supplement: Supp_Fig2.pdf [file Supp_Fig2.pdf]

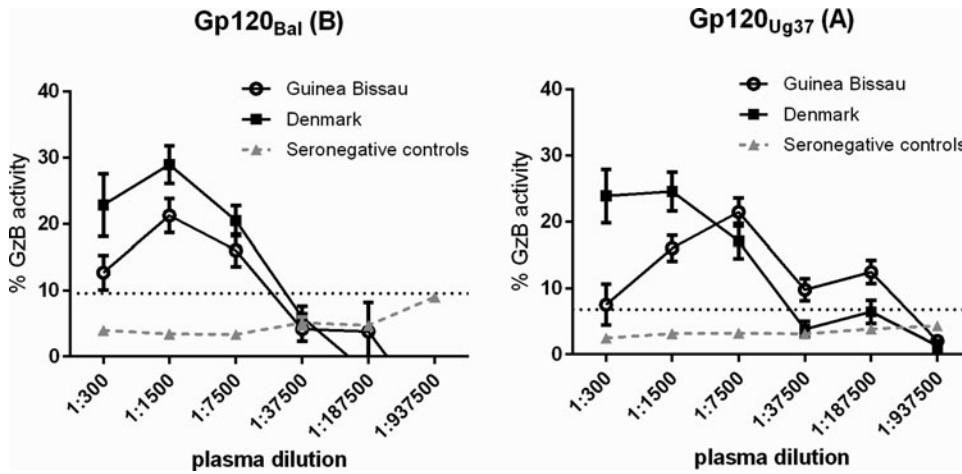

**SUPPLEMENTARY FIG. S2.** Percent GzB activity for plasma samples from Guinea-Bissau ( $n = 13$ , open symbols) and Denmark ( $n = 10$ , closed symbols) at different dilutions against gp120<sub>BaL</sub> and gp120<sub>UG37</sub> Env (subtypes B and A, respectively). The dotted line represents the threshold for positive ADCC activity based on HIV-negative plasma samples.
